# Supplementary material for: The efficacy and safety of a ketogenic diet for children with refractory epilepsy in China: a retrospective single-center cohort study
Source: PubMed Central journal article supplement — Transl Pediatr. 2020 Aug;9(4):561–6. doi: 10.21037/tp-20-219 (PMC7475313; doi:10.21037/tp-20-219), 2020-08
Supplement: tp-09-04-561-dss.pdf [file tp-09-04-561-dss.pdf]

## Data Sharing Statement

|                     |                                                                                                                                                     |                                                                                      |
|---------------------|-----------------------------------------------------------------------------------------------------------------------------------------------------|--------------------------------------------------------------------------------------|
| <b>Article Info</b> | <a href="http://dx.doi.org/10.21037/tp-20-219">http://dx.doi.org/10.21037/tp-20-219</a>                                                             |                                                                                      |
| <b>Item</b>         | <b>Question</b>                                                                                                                                     | <b>Authors' Response<br/>(place "-" if not applicable)</b>                           |
| 1                   | Would you like to share data collected for your study to others?                                                                                    | Yes.                                                                                 |
| 2                   | If not, would you like to share the reason for your decision?                                                                                       | -                                                                                    |
| 3                   | What data in particular will be shared?                                                                                                             | The follow up data of patients after ketogenic diet treatment.                       |
| 4                   | Any other documents will be shared? Such as study protocol, statistical analysis plan, informed consent form, clinical study report, analytic code. | I am willing to share research protocols, statistical analysis and informed consent. |
| 5                   | When will data availability begin?                                                                                                                  | After the article was published.                                                     |
| 6                   | When will data availability end?                                                                                                                    | Articles published within 2 years.                                                   |
| 7                   | To whom will you share the data?                                                                                                                    | Doctors interested in the study.                                                     |
| 8                   | For what type of analysis or purpose?                                                                                                               | It is used to analyze and evaluate the effectiveness and safety of ketogenic diet.   |
| 9                   | How or where can the data/documents be obtained?                                                                                                    | Email: lihua1051@163.com                                                             |
| 10                  | Any other restrictions?                                                                                                                             | Consider the balance of interests and risks to protect patients' privacy.            |
